# Supplementary material for: Changes in Revolving-Door Mental Health Hospitalizations during the COVID-19 Pandemic: A 5-Year Chart Review Study
Source: MDPI journal article supplement (doi:10.3390/jcm12072681), 2023-04-04
Supplement: s1 [file s1]

# Changes in Revolving-Door Mental Health Hospitalizations during the COVID-19 Pandemic: A 5-Year Chart Review Study

**Supplementary Table S1.** Description of participants (N=1,036).

| Measure                      |                  | Participants<br>without RD | Participants<br>with RD | Comparison between<br>Participants without/with RD |
|------------------------------|------------------|----------------------------|-------------------------|----------------------------------------------------|
| Sex                          | <i>Female</i>    | 484 (49.5%)                | 27 (45.8%)              | OR=1.16 (0.664, 2.052), p=0.594                    |
|                              | <i>Male</i>      | 493 (50.5%)                | 32 (54.2%)              |                                                    |
| Ethnicity                    | <i>Caucasian</i> | 897 (91.8%)                | 51 (86.4%)              | $\chi^2_{df=4}=2.53$ , p=0.470                     |
|                              | <i>Asian</i>     | 38 (3.9%)                  | 3 (5.1%)                |                                                    |
|                              | <i>Afro</i>      | 26 (2.7%)                  | 3 (5.1%)                |                                                    |
|                              | <i>Hispanic</i>  | 16 (1.6%)                  | 2 (3.4%)                |                                                    |
| Age at first hospitalisation |                  | 44.8 ±15.70 [17, 85]       | 37.3 ±14.04 [17, 75]    | $t_{df=67.1}=+3.96$ , p<0.001*                     |
| Age-group                    | <30 years-old    | 213 (21.8%)                | 24 (40.7%)              | $\chi^2_{df=3}=15.15$ , p=0.002*                   |
|                              | 30-40 years-old  | 184 (18.8%)                | 11 (18.6%)              |                                                    |
|                              | 41-50 years-old  | 215 (22.0%)                | 14 (23.7%)              |                                                    |
|                              | >50 years-old    | 365 (37.4%)                | 10 (16.9%)              |                                                    |

| Measure                                   |                                               | Participants<br>without RD  | Participants<br>with RD     | Comparison between<br>Participants without/with RD |
|-------------------------------------------|-----------------------------------------------|-----------------------------|-----------------------------|----------------------------------------------------|
| Number of hospitalisations                |                                               | 1.3 ±0.58 [1, 6]            | 5.5 ±2.71 [2, 19]           | U=507.0, p<0.001*                                  |
| Mean duration of hospitalisation in hours |                                               | 207.0 ±403.79 [1.0, 7176.0] | 201.0 ±159.43 [12.9, 794.5] | t <sub>df=110.7</sub> =+0.25, p=0.806              |
| Diagnosis                                 | <i>Psychotic disorder, non-affective</i>      | 297 (30.4%)                 | 29 (49.2%)                  | OR=2.21, 95% CI: (1.26, 3.89), p=0.004*            |
|                                           | <i>Affective disorder</i>                     | 319 (32.7%)                 | 26 (44.1%)                  | OR=1.62, 95% CI: (0.92, 2.85), p=0.087             |
|                                           | <i>Non-psychotic mental disorder</i>          | 250 (25.6%)                 | 21 (35.6%)                  | OR=1.61, 95% CI: (0.88, 2.87), p=0.095             |
|                                           | <i>Personality disorder</i>                   | 57 (5.8%)                   | 20 (33.9%)                  | OR=8.24, 95% CI: (4.27, 15.60), p<0.001*           |
|                                           | <i>Substance use disorder</i>                 | 72 (7.4%)                   | 9 (15.3%)                   | OR=2.26, 95% CI: (0.94, 4.89), p=0.041*            |
|                                           | <i>Intellectual disability</i>                | 37 (3.8%)                   | 12 (20.3%)                  | OR=6.46, 95% CI: (2.88, 13.71), p<0.001*           |
|                                           | <i>Physiological condition</i>                | 21 (2.1%)                   | 3 (5.1%)                    | OR=2.44, 95% CI: (0.45, 8.53), p=0.152             |
|                                           | <i>Other diagnosis</i>                        | 31 (3.2%)                   | 8 (13.6%)                   | OR=4.77, 95% CI: (1.80, 11.32), p=0.001*           |
| Referral source                           | <i>Mental Health Service</i>                  | 823 (84.2%)                 | 54 (91.5%)                  | OR=2.02, 95% CI: (0.80, 6.58), p=0.190             |
|                                           | <i>Addiction Service</i>                      | 47 (4.8%)                   | 6 (10.2%)                   | OR=2.24, 95% CI: (0.75, 5.58), p=0.116             |
|                                           | <i>Disability Service</i>                     | 7 (0.7%)                    | 1 (1.7%)                    | OR=2.39, 95% CI: (0.05, 19.08), p=0.375            |
|                                           | <i>Child/Adolescent Mental Health Service</i> | 6 (0.6%)                    | 1 (1.7%)                    | OR=2.79, 95% CI: (0.06, 23.55), p=0.337            |
|                                           | <i>Private Service</i>                        | 48 (4.9%)                   | 2 (3.4%)                    | OR=0.68, 95% CI: (0.08, 2.71), p>0.999             |
|                                           | <i>Unknown Service</i>                        | 85 (8.7%)                   | 2 (3.4%)                    | OR=0.37, 95% CI: (0.04, 1.44), p=0.223             |
| Any compulsory                            |                                               | 138 (14.1%)                 | 16 (27.1%)                  | OR=2.26, 95% CI: (1.16, 4.23), p=0.013*            |
| Any absconding                            |                                               | 31 (3.2%)                   | 17 (28.8%)                  | OR=12.28, 95% CI: (5.89, 25.06), p<0.001*          |

| Measure              |                                      | Participants<br>without RD | Participants<br>with RD | Comparison between<br>Participants without/with RD |
|----------------------|--------------------------------------|----------------------------|-------------------------|----------------------------------------------------|
| Phase of<br>CODID-19 | <i>Only pre-pandemic</i>             | 460 (47.1%)                | 17 (28.8%)              | $\chi^2_{df=2}=92.26, p<0.001^*$                   |
|                      | <i>Both pre- &amp; post-pandemic</i> | 74 (7.6%)                  | 27 (45.8%)              |                                                    |
|                      | <i>Only post-pandemic</i>            | 443 (45.3%)                | 15 (25.4%)              |                                                    |
| Number of RD         |                                      | -                          | 2.7 $\pm$ 2.48 [1, 17]  | -                                                  |
| Any RD               |                                      | 0 (0.0%)                   | 59 (100.0%)             | -                                                  |

CI, Confidence interval; df, Degrees of freedom; RD, Hospitalisation classified as revolving-door; OR, Odd-ratio; \*, The difference between patients with and without revolving-door is statistically significant (with  $p<0.050$ ); frequencies and percentage (between brackets) are reported for categorical measures; mean, standard deviation, and range (between square brackets) are reported for dimensional measures

**Supplementary Figure S1.** Distribution of the proportion of hospitalizations classified as revolving-door by year, trimester, and month.

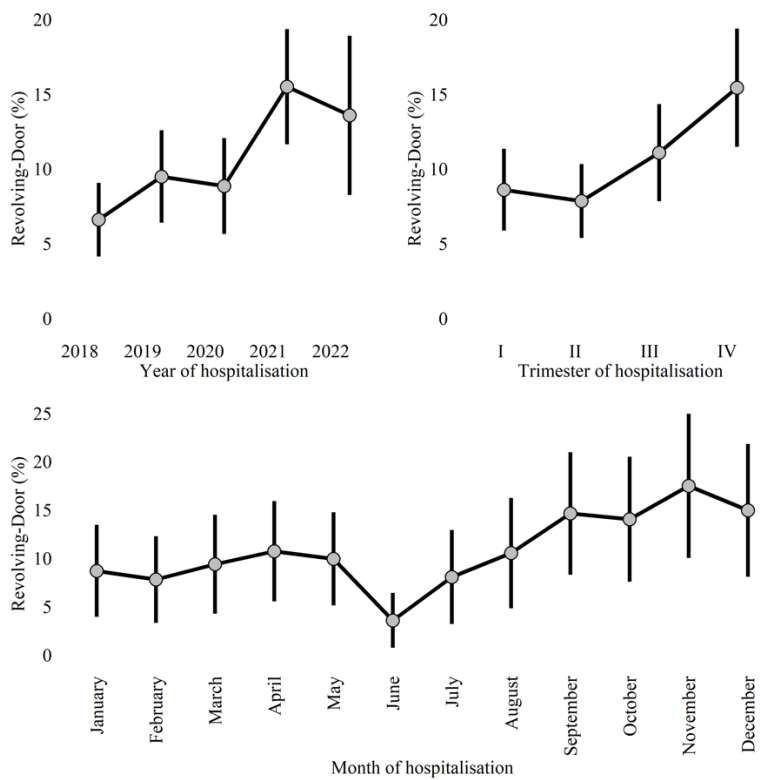

| Test of main effect          |                                   |
|------------------------------|-----------------------------------|
| Year of hospitalization      | $F_{4,1546}=+4.67, p<0.001^{***}$ |
| Trimester of hospitalization | $F_{3,1547}=+4.58, p=0.003^{**}$  |
| Month of hospitalization     | $F_{11,1539}=+2.08, p=0.019^{*}$  |

**Supplementary Figure S2.** Distribution of the proportion of hospitalizations classified as revolving-door by year, trimester, and month, considering the phase of COVID-19 pandemic (pre- and post-onset in Italy, February 21, 2020).

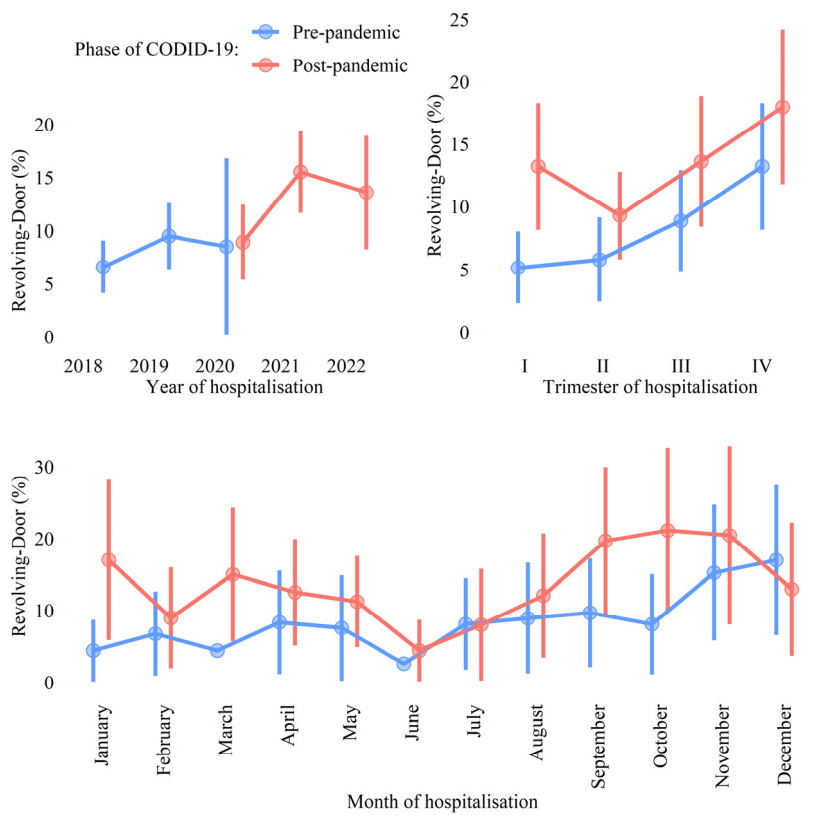

**Test of interaction**

|                                                   |                              |
|---------------------------------------------------|------------------------------|
| Trimester of hospitalization by phase of COVID-19 | $F_{3,1543}=+0.42, p=0.736$  |
| Month of hospitalization by phase of COVID-19     | $F_{11,1527}=+0.92, p=0.524$ |

**Supplementary Figure S3.** General description of observations.

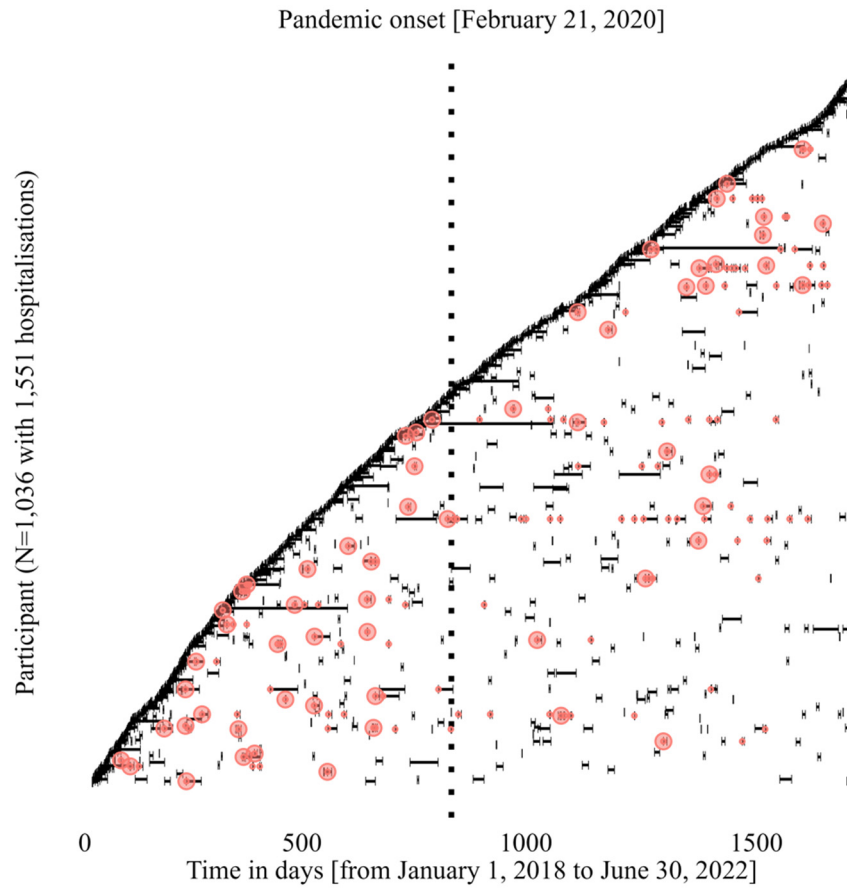

Hospitalizations organized by participant (with duration in days). Hospitalizations classified as revolving-door are marked (circles), with larger circles identifying the first hospitalization with revolving-door for the participant. The onset of COVID-19 pandemic in Italy is indicated by a dotted vertical line

Supplementary Figure S4. Cumulative hazard for revolving-door in patients at first contact with service, before and after COVID-19 onset

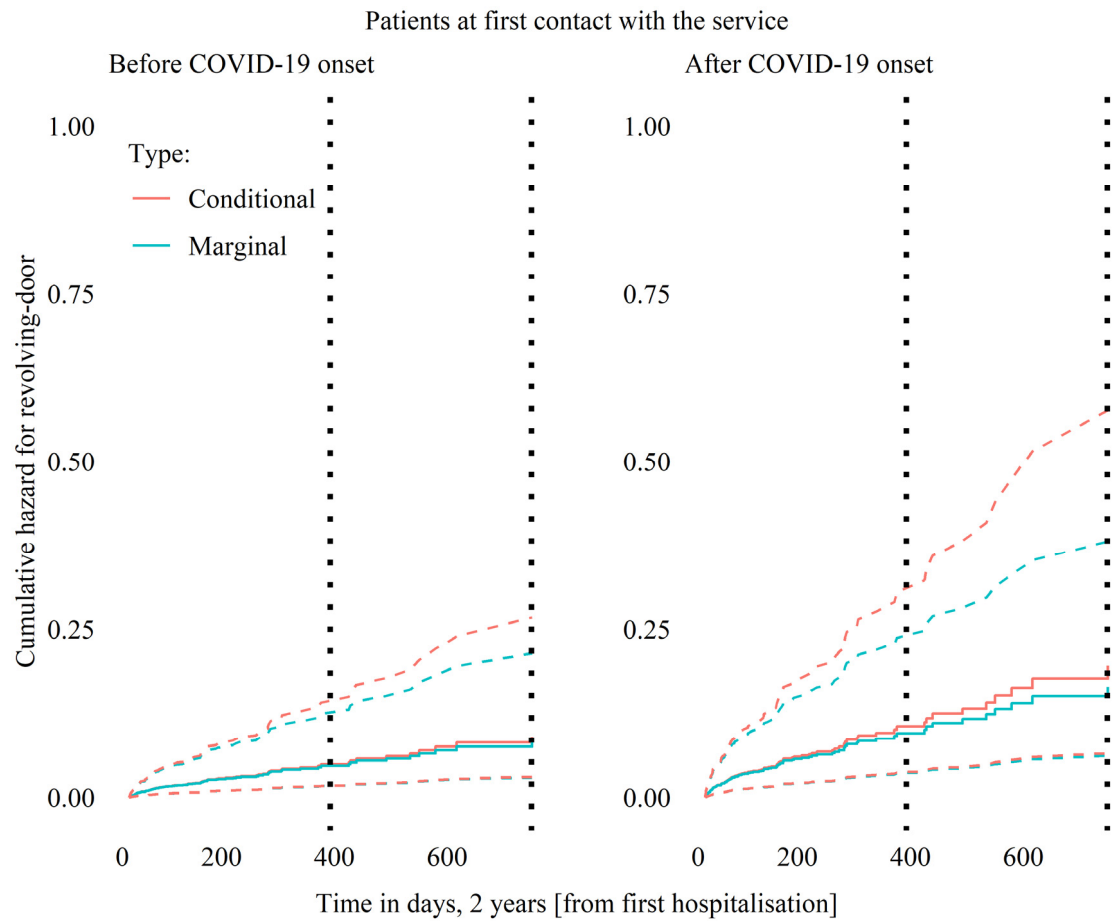

Survival analysis with shared frailty; both marginal and conditional cumulative hazards are reported; models are fitted for a prevision of 2-years from the first hospitalization, with dotted lines indicating years

**Supplementary Figure S5.** Cumulative hazard for revolving-door in a previously hospitalized patient, before and after COVID-19 onset

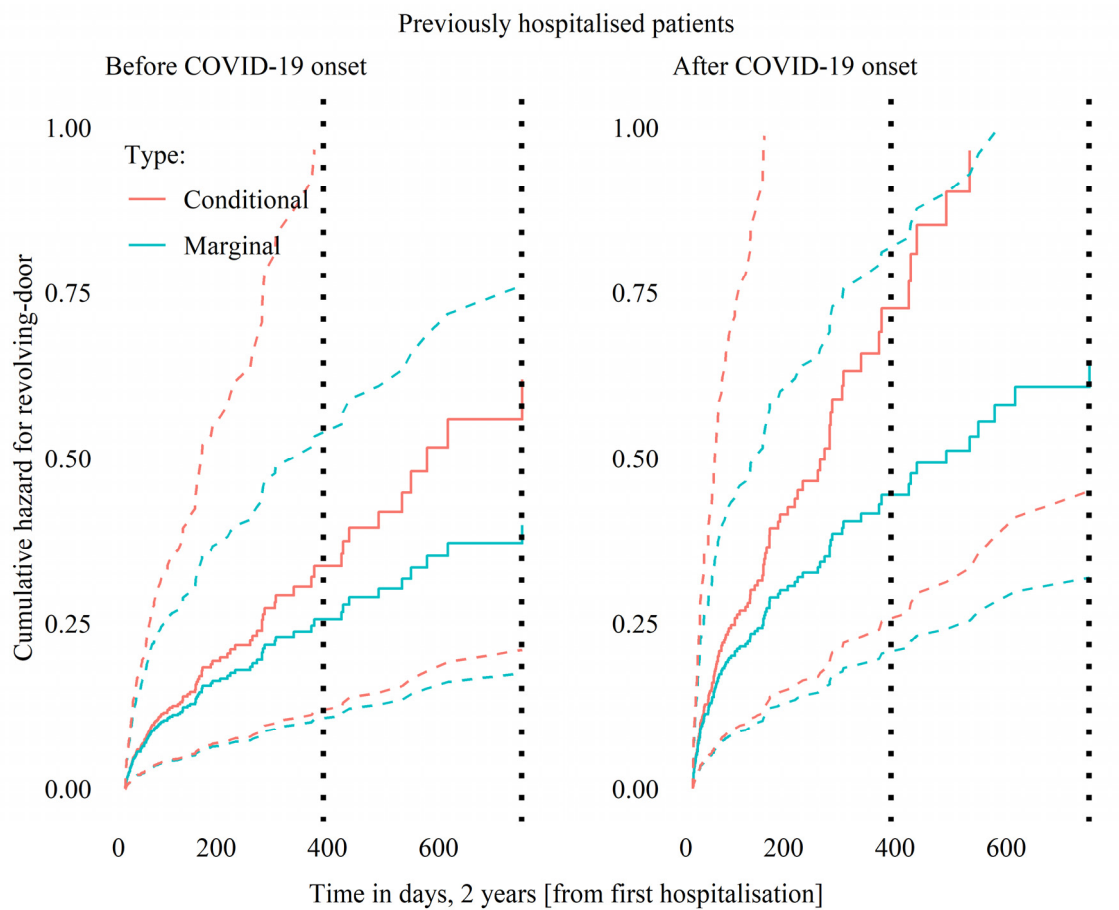

Survival analysis with shared frailty; both marginal and conditional cumulative hazards are reported; models are fitted for a prevision of 2-years from the first hospitalization, with dotted lines indicating years
